# Supplementary material for: Aerobic and facultative anaerobic Klebsiella pneumoniae strains establish mutual competition and jointly promote Musca domestica development
Source: Front Immunol. 2023 Feb 17;14:1102065. doi: 10.3389/fimmu.2023.1102065 (PMC9982019; doi:10.3389/fimmu.2023.1102065)
Supplement: Supplementary file 2 [file Table_2.xlsx]

## Sheet: table S2 KXP
Table S2. Functional annotation of genes in phage KXP except hypothetical proteins.
ID	strand	start	end	NR	Swissprot	KEGG	GO	Pfam
KXP_g6	+	5454	6500	YP_003347662.1|putative peptidase	-		-	-
KXP_g8	+	7051	7749	QGZ00723.1|DNA primase	-		-	PF13155.7|Toprim_2
KXP_g10	+	7941	9221	YP_009204805.1|putative DNA helicase	-		-	PF13481.7|AAA_25
KXP_g13	+	9744	12134	QIN95054.1|DNA-directed DNA polymerase	P30314|DPOL_BPSP1|DNA polymerase		GO:0004527|molecular_function|exonuclease activity;GO:0006260|biological_process|DNA replication;GO:0016740|molecular_function|transferase activity;GO:0016779|molecular_function|nucleotidyltransferase activity;GO:0016787|molecular_function|hydrolase activity;GO:0039693|biological_process|viral DNA genome replication;GO:0003677|molecular_function|DNA binding;GO:0003887|molecular_function|DNA-direc…	PF00476.21|DNA_pol_A
KXP_g16	+	12791	13771	QGZ00908.1|phospohoesterase	-		-	-
KXP_g18	+	14185	15012	QCG76609.1|putative large tegument protein	-		-	-
KXP_g23	+	16220	17188	YP_009792381.1|5'-3' exonuclease	-		-	-
KXP_g24	+	17794	18189	QDJ96089.1|putative endonuclease	O64250|VG59_BPMD2|Gene 59 protein	K18960|gp49; recombination endonuclease VII	-	PF02945.16|Endonuclease_7
KXP_g29	+	21907	23502	YP_009204826.1|head-tail connector protein	Q7Y2D5|PORTL_BPKMV|Portal protein		GO:0099002|biological_process|viral genome ejection through host cell envelope, short tail mechanism;GO:0019012|cellular_component|virion;GO:0019028|cellular_component|viral capsid;GO:0046718|biological_process|viral entry into host cell	PF12236.9|Head-tail_con
KXP_g30	+	23517	24359	YP_009188780.1|head scaffolding protein	-		-	-
KXP_g31	+	24385	25404	YP_009098373.1|putative capsid protein	Q7Y2D3|CAPSD_BPKMV|Major capsid protein		GO:0019012|cellular_component|virion;GO:0019028|cellular_component|viral capsid	-
KXP_g33	+	25687	26247	YP_009799485.1|tail tubular protein	-		-	PF17212.4|Tube
KXP_g34	+	26257	28617	YP_009280708.1|putative tail tubular protein B	P03747|TUBE2_BPT7|Tail tubular protein gp12		GO:0098026|cellular_component|virus tail, tube;GO:0099002|biological_process|viral genome ejection through host cell envelope, short tail mechanism;GO:0019012|cellular_component|virion;GO:0046718|biological_process|viral entry into host cell;GO:0098015|cellular_component|virus tail	-
KXP_g35	+	28628	29206	YP_009302746.1|putative internal virion protein	-		-	-
KXP_g37	+	31959	35657	YP_009098378.1|putative internal core protein	-		-	-
KXP_g38	+	35650	38499	YP_009792400.1|putative tail fiber protein	-		-	PF03906.15|Phage_T7_tail
KXP_g39	+	38501	38803	YP_003347644.1|putative DNA maturase A	-		-	-
KXP_g40	+	38803	40659	QIW86422.1|DNA maturase B	P03694|TERL_BPT7|Terminase, large subunit		GO:0005524|molecular_function|ATP binding;GO:0016787|molecular_function|hydrolase activity;GO:0046872|molecular_function|metal ion binding;GO:0000166|molecular_function|nucleotide binding;GO:0004518|molecular_function|nuclease activity;GO:0004519|molecular_function|endonuclease activity	-
KXP_g44	+	41639	41890	YP_009199935.1|putative holin	-		-	PF04971.13|Phage_holin_2_1
KXP_g45	+	41874	42482	QGZ00945.1|endolysin	Q7Y2C0|ENLYS_BPKMV|SAR-endolysin	K01185|E3.2.1.17; lysozyme	GO:0009253|biological_process|peptidoglycan catabolic process;GO:0016020|cellular_component|membrane;GO:0016021|cellular_component|integral component of membrane;GO:0016787|molecular_function|hydrolase activity;GO:0016798|molecular_function|hydrolase activity, acting on glycosyl bonds;GO:0019835|biological_process|cytolysis;GO:0020002|cellular_component|host cell plasma membrane;GO:0033644|cellul…	-

## Sheet: table S3 KYP
Table S3. Functional annotation of genes in phage KYP except hypothetical proteins.
ID	strand	start	end	NR	Swissprot	KEGG	GO	Pfam
KYP_g1	+	1	3177	QGF20974.1|lytic glycosylase	-		-	-
KYP_g2	+	3277	5499	YP_007007802.1|putative tail fiber protein	-		-	PF13472.7|Lipase_GDSL_2
KYP_g5	+	6428	6829	QHB36537.1|DNA maturase	-		-	-
KYP_g6	+	6829	8742	QHB36538.1|DNA packaging protein, partial	P03694|TERL_BPT7|Terminase, large subunit		GO:0005524|molecular_function|ATP binding;GO:0016787|molecular_function|hydrolase activity;GO:0046872|molecular_function|metal ion binding;GO:0000166|molecular_function|nucleotide binding;GO:0004518|molecular_function|nuclease activity;GO:0004519|molecular_function|endonuclease activity	-
KYP_g7	+	8766	9368	YP_009845630.1|tail assembly protein	P85991|IGLVP_BPSK9|Ig-like virion protein		GO:0098003|biological_process|viral tail assembly;GO:0098015|cellular_component|virus tail;GO:0098026|cellular_component|virus tail, tube;GO:0099001|biological_process|viral genome ejection through host cell envelope, long flexible tail mechanism;GO:0019012|cellular_component|virion;GO:0030430|cellular_component|host cell cytoplasm;GO:0046718|biological_process|viral entry into host cell	PF02368.19|Big_2
KYP_g8	+	9399	9977	YP_009818120.1|lysozyme	Q37875|ENLYS_BPP1|SAR-endolysin	K01185|E3.2.1.17; lysozyme	GO:0009253|biological_process|peptidoglycan catabolic process;GO:0016787|molecular_function|hydrolase activity;GO:0016798|molecular_function|hydrolase activity, acting on glycosyl bonds;GO:0019835|biological_process|cytolysis;GO:0030430|cellular_component|host cell cytoplasm;GO:0042742|biological_process|defense response to bacterium;GO:0044659|biological_process|viral release from host cell by c…	PF00959.20|Phage_lysozyme
KYP_g25	+	18494	19744	YP_009203170.1|DNA helicase	-		-	PF13481.7|AAA_25
KYP_g26	+	19920	20912	QGF20957.1|ATP dependent DNA ligase	P07717|DNLI_BPT3|DNA ligase		GO:0006260|biological_process|DNA replication;GO:0006281|biological_process|DNA repair;GO:0006310|biological_process|DNA recombination;GO:0006974|biological_process|cellular response to DNA damage stimulus;GO:0016874|molecular_function|ligase activity;GO:0046872|molecular_function|metal ion binding;GO:0000166|molecular_function|nucleotide binding;GO:0003910|molecular_function|DNA ligase (ATP) act…	PF14743.7|DNA_ligase_OB_2
KYP_g28	+	21495	24020	YP_007348339.1|DNA polymerase	P30314|DPOL_BPSP1|DNA polymerase		GO:0004527|molecular_function|exonuclease activity;GO:0006260|biological_process|DNA replication;GO:0016740|molecular_function|transferase activity;GO:0016779|molecular_function|nucleotidyltransferase activity;GO:0016787|molecular_function|hydrolase activity;GO:0039693|biological_process|viral DNA genome replication;GO:0003677|molecular_function|DNA binding;GO:0003887|molecular_function|DNA-direc…	PF00476.21|DNA_pol_A
KYP_g30	+	24919	25848	YP_007236334.2|5'-exonuclease	-		-	-
KYP_g34	+	27793	28299	YP_007002887.1|putative polynucleotide 5' kinase/3' phosphatase	-		-	-
KYP_g37	+	29085	31517	QGF20965.1|RNA polymerase	P00573|RPOL_BPT7|T7 RNA polymerase		GO:0019083|biological_process|viral transcription;GO:0039695|biological_process|DNA-templated viral transcription;GO:0003899|molecular_function|DNA-directed 5'-3' RNA polymerase activity;GO:0016740|molecular_function|transferase activity;GO:0016779|molecular_function|nucleotidyltransferase activity	PF14700.7|RPOL_N
KYP_g41	+	32627	34132	QGF20967.1|head-tail connector	P20323|PORTL_BPT3|Portal protein		GO:0046718|biological_process|viral entry into host cell;GO:0046798|cellular_component|viral portal complex;GO:0099002|biological_process|viral genome ejection through host cell envelope, short tail mechanism;GO:0019012|cellular_component|virion;GO:0019028|cellular_component|viral capsid;GO:0019073|biological_process|viral DNA genome packaging	PF12236.9|Head-tail_con
KYP_g42	+	34297	34914	YP_007348354.1|scaffolding protein	-		-	-
KYP_g43	+	34994	36037	QGF20969.1|major capsid protein	Q7Y2D3|CAPSD_BPKMV|Major capsid protein		GO:0019012|cellular_component|virion;GO:0019028|cellular_component|viral capsid	-
KYP_g44	+	36089	36673	YP_009816857.1|tail tubular protein A	-		-	PF17212.4|Tube
KYP_g45	+	36699	39278	QGF20971.1|tail fiber protein	P03747|TUBE2_BPT7|Tail tubular protein gp12		GO:0098026|cellular_component|virus tail, tube;GO:0099002|biological_process|viral genome ejection through host cell envelope, short tail mechanism;GO:0019012|cellular_component|virion;GO:0046718|biological_process|viral entry into host cell;GO:0098015|cellular_component|virus tail	-
KYP_g47	+	40221	42287	QGF20973.1|internal core protein A	-		-	-
KYP_g48	+	42291	43193	QGF20974.1|lytic glycosylase	-		-	PF01464.21|SLT
